# Supplementary material for: Structure of tRNA splicing enzyme Tpt1 illuminates the mechanism of RNA 2′-PO4 recognition and ADP-ribosylation
Source: Nat Commun. 2019 Jan 15;10:218. doi: 10.1038/s41467-018-08211-9 (PMC6333775; doi:10.1038/s41467-018-08211-9)
Supplement: Supplementary file 1 — Supplementary Information [file 41467_2018_8211_MOESM1_ESM.pdf]

Supplementary Information

**Structure of tRNA splicing enzyme Tpt1 illuminates the mechanism of RNA 2'-PO<sub>4</sub> recognition and ADP-ribosylation**

Banerjee et al.

**Supplementary Table 1 Data collection and refinement statistics**

|                                                     | <b>Tpt1 (PDB 6E3A)</b>     | <b>Tpt1-C46S (PDB 6EDE)</b> |
|-----------------------------------------------------|----------------------------|-----------------------------|
| <b>Data collection</b>                              |                            |                             |
| Space group                                         | <i>P</i> 6 <sub>1</sub> 22 | <i>P</i> 6 <sub>1</sub> 22  |
| Cell dimensions                                     |                            |                             |
| <i>a</i> , <i>b</i> , <i>c</i> (Å)                  | 53.37, 53.37, 308.9        | 53.28, 53.28, 308.39        |
| $\alpha$ , $\beta$ , $\gamma$ (°)                   | 90.00, 90.00, 120.00       | 90.00, 90.00, 120.00        |
| Resolution (Å)                                      | 50.00-1.40 (1.42-1.40)*    | 50.00-1.55 (1.59-1.55)      |
| <i>R</i> <sub>pim</sub>                             | 0.016 (0.252)              | 0.014 (0.208)               |
| <i>I</i> / $\sigma$ <i>I</i>                        | 58.1 (2.1)                 | 56.6 (2.8)                  |
| Completeness (%)                                    | 99.8 (97.8)                | 99.3 (85.8)                 |
| Redundancy                                          | 17.5 (10.9)                | 17.7 (9.8)                  |
| <i>CC</i> <sub>1/2</sub>                            | 0.998 (0.823)              | 0.99 (0.884)                |
| <b>Refinement</b>                                   |                            |                             |
| Resolution (Å)                                      | 50.0-1.40                  | 50.00-1.55                  |
| No. reflections                                     | 52908                      | 38941                       |
| <i>R</i> <sub>work</sub> / <i>R</i> <sub>free</sub> | 0.1616 / 0.1857            | 0.1727 / 0.1876             |
| No. atoms                                           |                            |                             |
| Protein                                             | 1476                       | 1459                        |
| Ligand/ion                                          | 88                         | 40                          |
| Water                                               | 192                        | 201                         |
| <i>B</i> -factors                                   |                            |                             |
| Protein                                             | 31.9                       | 27.0                        |
| Ligand/ion                                          | 44.8                       | 19.4                        |
| Water                                               | 42.9                       | 40.4                        |
| R.m.s. deviations                                   |                            |                             |
| Bond lengths (Å)                                    | 0.015                      | 0.005                       |
| Bond angles (°)                                     | 1.467                      | 0.853                       |

\*Values in parentheses are for highest-resolution shell.

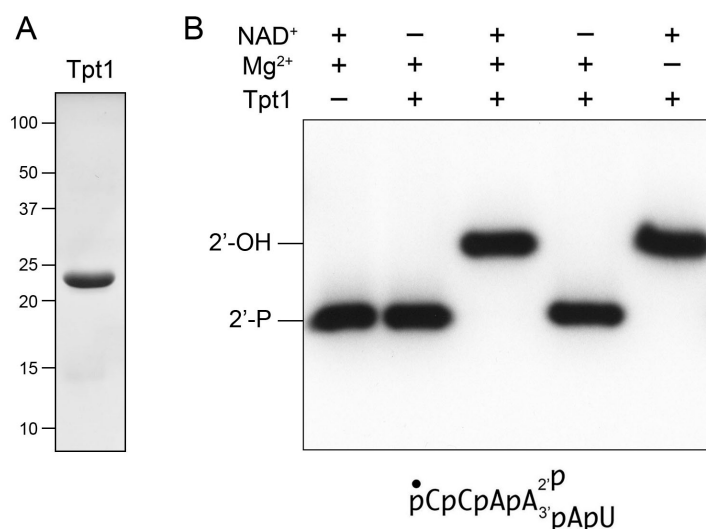

Supplementary Figure 1. RNA 2'-phosphotransferase activity of recombinant CthTpt1. (A) An aliquot (5  $\mu$ g) of the CthTpt1 preparation was analyzed by SDS-PAGE. The Coomassie blue-stained gel is shown. The positions and sizes (kDa) of marker polypeptide are indicated at left. (B) Reaction mixtures (10  $\mu$ l) containing 100 mM Tris-HCl, pH 7.5, 0.2  $\mu$ M (2 pmol) 5'  $^{32}$ P-labeled 6-mer 2'-PO<sub>4</sub> RNA (shown at bottom), 1 mM NAD<sup>+</sup> (where indicated by +), 5 mM MgCl<sub>2</sub> (where indicated by +), and 0.1  $\mu$ M (1 pmol) CthTpt1 (where indicated by +), were incubated at 37°C for 30 min. The reactions were quenched by adding three volumes of cold 90% formamide, 50 mM EDTA. The products were analyzed by urea-PAGE and visualized by autoradiography. The positions of the 6-mer 2'-PO<sub>4</sub> RNA substrate (2'-P) and 2'-OH RNA product (2'-OH) of the canonical Tpt1 reaction are indicated on the left.

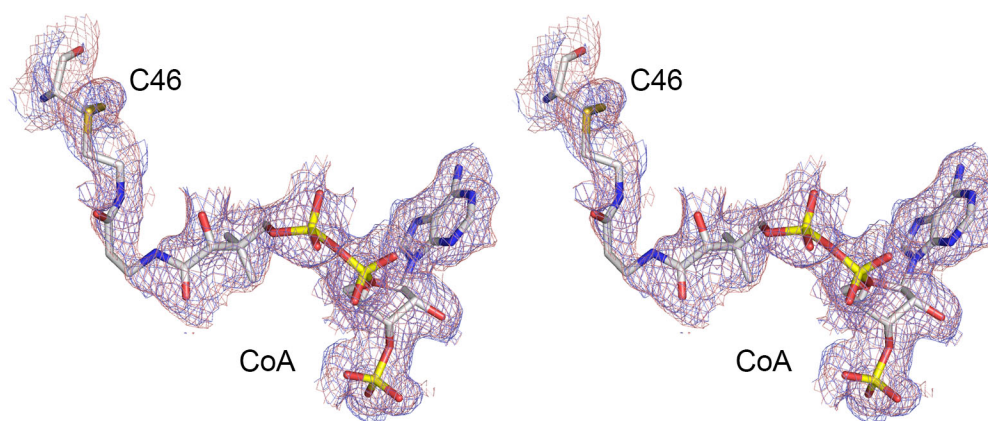

Supplementary Figure 2. Stereo view of SA omit maps of the coenzyme A (CoA) ligand. The Fo-Fc map, contoured at  $0.9\sigma$ , is colored blue. The 2Fo-Fc map, contoured at  $0.35\sigma$ , is colored red. The maps were calculated with CoA and ADPR-1"-PO<sub>4</sub> omitted from the model. The 2Fo-Fc map shows that CoA and Cys46 (shown as stick models) are linked via a disulfide bond.

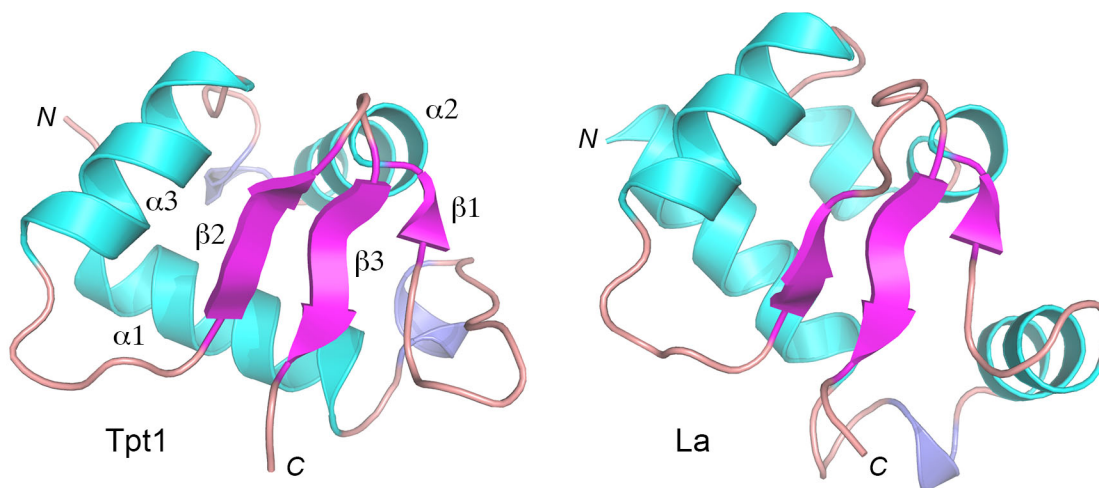

Supplementary Figure 3. The Tpt1 RNA lobe is a winged helix fold with similarity to human La protein. Side-by-side alignment of the winged helix modules of CthTpt1 (with secondary structure elements labeled) and human La protein (pdb 1YTY).

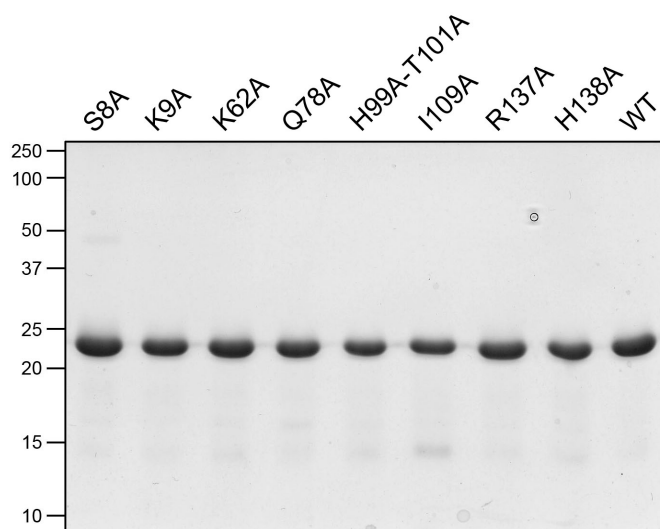

Supplementary Figure 4. Tpt1-Ala mutants. Aliquots (~5  $\mu$ g) of purified recombinant wild-type RslTpt1 and the indicated Ala-mutants were analyzed by SDS-PAGE. The Coomassie blue-stained gel is shown. The positions and sizes (kDa) of marker proteins are indicated on the left.
